# Supplementary material for: Ba7(BO3)3GeO4X (X = Cl, Br): borogermanate halides with rigid GeO4tetrahedra and flexible XBa6octahedra
Source: Royal Society of Chemistry journal article supplement (doi:10.1039/c5ra07450a), 2015-01-01
Supplement: c5ra07450a1.pdf [file c5ra07450a1.pdf]

## Supporting Information

### **Ba<sub>7</sub>(BO<sub>3</sub>)<sub>3</sub>GeO<sub>4</sub>X (X=Cl, Br): the borogermanate halides with rigid GeO<sub>4</sub> Tetrahedra and flexible XBa<sub>6</sub> octahedra**

Ming Wen,<sup>ab</sup> Zhipeng Lian,<sup>c</sup> Hongping Wu,<sup>\*a</sup> Xin Su,<sup>ab</sup> Qingfeng Yan,<sup>c</sup>

Juanjuan Lu,<sup>ab</sup> Zhihua Yang<sup>\*a</sup> and Shilie Pan<sup>\*a</sup>

*<sup>a</sup>Key Laboratory of Functional Materials and Devices for Special Environments of  
CAS; Xinjiang Key Laboratory of Electronic Information Materials and Devices;  
Xinjiang Technical Institute of Physics & Chemistry of CAS, 40-1 South Beijing Road,  
Urumqi 830011, China*

*<sup>b</sup>University of Chinese Academy of Sciences, Beijing 100049, China*

*<sup>c</sup>Department of chemistry, Tsinghua University, Beijing, 100084, China*

To whom correspondence should be addressed. Phone: +(86)-991-3838957.

Fax: +(86)-991-3674558. \*E-mail: slpan@ms.xjb.ac.cn. (Shilie Pan.)

wuhp@ms.xjb.ac.cn. (Hongping Wu.)

**Table S1.** The substitution of Ge for Si in borate.

| Compounds                                                      | Space group                                     | Structural features of Si–O and B–O groups | R=O/M (M=Si or Ge) | References |
|----------------------------------------------------------------|-------------------------------------------------|--------------------------------------------|--------------------|------------|
| KS <sub>2</sub> BO <sub>6</sub>                                | <i>I-43d</i>                                    | 0D                                         | 3                  | 1          |
| KGe <sub>2</sub> BO <sub>6</sub>                               | <i>P2<sub>1</sub>2<sub>1</sub>2<sub>1</sub></i> | 3D                                         | 3                  | 2          |
| Cs <sub>2</sub> SiB <sub>4</sub> O <sub>9</sub>                | <i>I-4</i>                                      | 3D                                         | 9                  | 3          |
| Cs <sub>2</sub> GeB <sub>4</sub> O <sub>9</sub>                | <i>I-4</i>                                      | 3D                                         | 9                  | 4          |
| LiSiBO <sub>4</sub>                                            | <i>I-4</i>                                      | 3D                                         | 4                  | 5          |
| LiGeBO <sub>4</sub>                                            | <i>I-4</i>                                      | 3D                                         | 4                  | 5          |
| SrSi <sub>2</sub> B <sub>2</sub> O <sub>8</sub>                | <i>Pnma</i>                                     | 3D                                         | 4                  | 6          |
| SrGe <sub>2</sub> B <sub>2</sub> O <sub>8</sub>                | <i>Pnma</i>                                     | 3D                                         | 4                  | 7          |
| Ba <sub>3</sub> Si <sub>2</sub> B <sub>6</sub> O <sub>16</sub> | <i>P-1</i>                                      | 2D                                         | 8                  | 8          |
| Ba <sub>3</sub> Ge <sub>2</sub> B <sub>6</sub> O <sub>16</sub> | <i>P-1</i>                                      | 2D                                         | 8                  | 9          |
| LaSiBO <sub>5</sub>                                            | <i>P 3<sub>1</sub></i>                          | 1D                                         | 5                  | 10         |
| LaGeBO <sub>5</sub>                                            | <i>P 3<sub>1</sub></i>                          | 1D                                         | 5                  | 11         |

### References

1. M. Ihara and F. Kamei, *J. Ceram. Soc. Jpn.*, 1980, **88**, 32.
2. Z. E. Lin, J. Zhang and G. Y. Yang, *Inorg. Chem.*, 2003, **42**, 1797.
3. H. P. Wu, H. W. Yu, S. L. Pan, Z. J. Huang, Z. H. Yang, X. Su and K. R. Poeppelmeier, *Angew. Chem. Int. Ed.*, 2013, **52**, 3406.
4. X. Xu, C. L. Hu, F. Kong, J. H. Zhang, J. G. Mao and J. L. Sun, *Inorg. Chem.*, 2013, **52**, 5831.
5. J. B. Parise and T. E. Gier, *Chem. Mater.*, 1992, **4**, 1065.
6. T. Berger and K. J. Range, *Z. Naturforsch. B*, 1996, **51**, 172.
7. Y. C. Hao, C. L. Hu, X. Xu, F. Kong and J. G. Mao, *Inorg. Chem.*, 2013, **52**, 13644.
8. C. Heyward, C. D. McMillen and J. J. Kolis, *Solid State Chem.*, 2013, **203**, 166.
9. J. H. Zhang, F. Kong and J. G. Mao, *Inorg. Chem.*, 2011, **50**, 3037.
10. V. R. Samygina, E. A. Genkina, B. A. Maksimov and N. I. Leonyuk, *Kristallografiya*, 1993, **38**, 61.
11. A. Kaminskii, B. V. Mill, E. L. Belokoneva and A. V. Butashin, *Izv. Akad. Nauk SSSR*, 1990, **26**, 1105

**Table S2a.** Atomic coordinates ( $\times 10^4$ ) and equivalent isotropic displacement parameters ( $\text{\AA}^2 \times 10^3$ ) for  $\text{Ba}_7(\text{BO}_3)_3\text{GeO}_4\text{Cl}$ .  $U_{\text{eq}}$  is defined as one-third of the trace of the orthogonalized  $U_{ij}$  tensor.

| Atom  | x       | y        | z        | U (eq) |
|-------|---------|----------|----------|--------|
| Ba(1) | 1318(1) | 6206(1)  | 0        | 12(1)  |
| Ba(2) | 836(1)  | 8671(1)  | 5000     | 10(1)  |
| Ba(3) | 2253(1) | 5299(1)  | 5000     | 10(1)  |
| Ba(4) | 0       | 0        | 1875(1)  | 10(1)  |
| Ba(5) | 1840(1) | 1978(1)  | 2322(1)  | 15(1)  |
| Ba(6) | 0       | 5000     | 2646(1)  | 15(1)  |
| Ge(1) | 826(1)  | 2912(2)  | 5000     | 9(1)   |
| B(1)  | 1601(5) | 7260(13) | 2759(10) | 9(2)   |
| B(2)  | 485(8)  | 2860(20) | 0        | 15(3)  |
| Cl(1) | 2232(2) | 9488(5)  | 0        | 25(1)  |
| O(1)  | 1640(4) | 2132(11) | 5000     | 10(2)  |
| O(2)  | 159(4)  | 7679(11) | 0        | 14(2)  |
| O(3)  | 1868(3) | 5644(8)  | 2401(6)  | 17(2)  |
| O(4)  | 3021(3) | 3317(8)  | 6457(6)  | 17(2)  |
| O(5)  | 804(3)  | 3102(8)  | 1065(6)  | 16(2)  |
| O(6)  | 815(5)  | 5243(12) | 5000     | 19(2)  |
| O(7)  | 451(3)  | 1946(9)  | 3743(7)  | 19(2)  |
| O(8)  | 995(3)  | 7836(9)  | 2405(7)  | 19(2)  |

**Table S2b.** Atomic coordinates ( $\times 10^4$ ) and equivalent isotropic displacement parameters ( $\text{\AA}^2 \times 10^3$ ) for  $\text{Ba}_7(\text{BO}_3)_3\text{GeO}_4\text{Br}$ .  $U_{\text{eq}}$  is defined as one-third of the trace of the orthogonalized  $U_{ij}$  tensor.

| Atom  | x       | y        | z       | U (eq) |
|-------|---------|----------|---------|--------|
| Ba(1) | 2257(1) | 9672(1)  | 5000    | 10(1)  |
| Ba(2) | 1282(1) | 8817(1)  | 0       | 13(1)  |
| Ba(3) | 833(1)  | 6332(1)  | 5000    | 10(1)  |
| Ba(4) | 0       | 5000     | 1886(1) | 10(1)  |
| Ba(5) | 0       | 0        | 2683(1) | 14(1)  |
| Ba(6) | 1839(1) | 2931(1)  | 2356(1) | 14(1)  |
| Ge(1) | 832(1)  | 2087(1)  | 5000    | 7(1)   |
| B(1)  | 1599(4) | 7741(10) | 2780(7) | 10(2)  |
| B(2)  | 483(5)  | 2209(14) | 0       | 9(2)   |
| Br(1) | 2215(1) | 5471(2)  | 0       | 22(1)  |
| O(1)  | 154(3)  | 7241(9)  | 0       | 13(1)  |
| O(2)  | 3042(2) | 1661(6)  | 6446(4) | 15(1)  |
| O(3)  | 1863(3) | 9330(7)  | 2414(4) | 18(1)  |
| O(4)  | 804(2)  | 1890(6)  | 1077(4) | 14(1)  |
| O(5)  | 981(3)  | 7210(7)  | 2437(4) | 22(1)  |
| O(6)  | 455(2)  | 3069(6)  | 3738(4) | 17(1)  |
| O(7)  | 1646(3) | 2820(9)  | 5000    | 17(2)  |
| O(8)  | 809(4)  | 9765(9)  | 5000    | 18(2)  |

**Table S3a.** Selected bond distances (Å) and angles (deg) for Ba<sub>7</sub>(BO<sub>3</sub>)<sub>3</sub>GeO<sub>4</sub>Cl

|               |           |                      |            |
|---------------|-----------|----------------------|------------|
| Ba(1)-O(2)    | 2.601(9)  | O(2)-Ba(1)-O(5)#1    | 90.3(2)    |
| Ba(1)-O(5)#1  | 2.793(7)  | O(2)-Ba(1)-O(5)      | 90.3(2)    |
| Ba(1)-O(5)    | 2.793(7)  | O(5)#1-Ba(1)-O(5)    | 50.2(3)    |
| Ba(1)-O(3)    | 2.925(7)  | O(2)-Ba(1)-O(3)      | 114.02(13) |
| Ba(1)-O(3)#1  | 2.925(7)  | O(5)#1-Ba(1)-O(3)    | 114.41(19) |
| Ba(1)-O(8)    | 3.008(7)  | O(5)-Ba(1)-O(3)      | 68.83(19)  |
| Ba(1)-O(8)#1  | 3.008(7)  | O(2)-Ba(1)-O(3)#1    | 114.02(13) |
| Ba(1)-Cl(1)   | 3.063(4)  | O(5)#1-Ba(1)-O(3)#1  | 68.83(19)  |
| Ba(1)-Cl(1)#2 | 3.214(4)  | O(5)-Ba(1)-O(3)#1    | 114.41(19) |
| Ba(2)-O(6)#3  | 2.542(9)  | O(3)-Ba(1)-O(3)#1    | 131.8(3)   |
| Ba(2)-O(4)#4  | 2.847(7)  | O(2)-Ba(1)-O(8)      | 68.44(14)  |
| Ba(2)-O(4)#5  | 2.847(7)  | O(5)#1-Ba(1)-O(8)    | 128.77(19) |
| Ba(2)-O(7)#6  | 2.909(7)  | O(5)-Ba(1)-O(8)      | 82.64(19)  |
| Ba(2)-O(7)    | 2.909(7)  | O(3)-Ba(1)-O(8)      | 47.88(19)  |
| Ba(2)-O(8)    | 2.970(8)  | O(3)#1-Ba(1)-O(8)    | 162.31(18) |
| Ba(2)-O(8)#6  | 2.970(8)  | O(2)-Ba(1)-O(8)#1    | 68.44(14)  |
| Ba(2)-O(7)#7  | 3.003(7)  | O(5)#1-Ba(1)-O(8)#1  | 82.64(19)  |
| Ba(2)-O(7)#8  | 3.003(7)  | O(5)-Ba(1)-O(8)#1    | 128.77(19) |
| Ba(2)-O(1)    | 3.044(8)  | O(3)-Ba(1)-O(8)#1    | 162.31(18) |
| Ba(3)-O(1)#9  | 2.632(9)  | O(3)#1-Ba(1)-O(8)#1  | 47.88(19)  |
| Ba(3)-O(1)#3  | 2.660(8)  | O(8)-Ba(1)-O(8)#1    | 125.6(3)   |
| Ba(3)-O(4)#6  | 2.689(7)  | O(2)-Ba(1)-Cl(1)     | 102.5(2)   |
| Ba(3)-O(4)    | 2.689(7)  | O(5)#1-Ba(1)-Cl(1)   | 151.96(14) |
| Ba(3)-O(4)#4  | 2.819(7)  | O(5)-Ba(1)-Cl(1)     | 151.96(14) |
| Ba(3)-O(4)#5  | 2.819(7)  | O(3)-Ba(1)-Cl(1)     | 83.16(13)  |
| Ba(3)-O(6)#3  | 2.926(10) | O(3)#1-Ba(1)-Cl(1)   | 83.16(13)  |
| Ba(3)-O(3)    | 3.006(7)  | O(8)-Ba(1)-Cl(1)     | 79.27(13)  |
| Ba(3)-O(3)#6  | 3.006(7)  | O(8)#1-Ba(1)-Cl(1)   | 79.27(13)  |
| Ba(4)-O(8)    | 2.650(7)  | O(2)-Ba(1)-Cl(1)#2   | 178.5(2)   |
| Ba(4)-O(8)#7  | 2.650(7)  | O(5)#1-Ba(1)-Cl(1)#2 | 90.99(15)  |
| Ba(4)-O(7)    | 2.690(7)  | O(5)-Ba(1)-Cl(1)#2   | 90.99(15)  |
| Ba(4)-O(7)#7  | 2.690(7)  | O(3)-Ba(1)-Cl(1)#2   | 65.93(13)  |
| Ba(4)-O(2)    | 2.724(6)  | O(3)#1-Ba(1)-Cl(1)#2 | 65.93(13)  |
| Ba(4)-O(2)#10 | 2.724(6)  | O(8)-Ba(1)-Cl(1)#2   | 111.11(13) |
| Ba(4)-O(5)#11 | 2.963(7)  | O(8)#1-Ba(1)-Cl(1)#2 | 111.11(13) |
| Ba(4)-O(5)#12 | 2.963(7)  | Cl(1)-Ba(1)-Cl(1)#2  | 75.97(7)   |
| Ba(5)-O(5)    | 2.664(7)  | O(6)#3-Ba(2)-O(4)#4  | 85.5(2)    |
| Ba(5)-O(3)    | 2.721(7)  | O(6)#3-Ba(2)-O(4)#5  | 85.5(2)    |
| Ba(5)-O(3)#14 | 2.810(7)  | O(4)#4-Ba(2)-O(4)#5  | 69.4(3)    |
| Ba(5)-O(4)#6  | 2.934(7)  | O(6)#3-Ba(2)-O(7)#6  | 146.11(18) |
| Ba(5)-O(1)#3  | 3.008(3)  | O(4)#4-Ba(2)-O(7)#6  | 91.36(19)  |
| Ba(5)-O(4)#9  | 3.049(7)  | O(4)#5-Ba(2)-O(7)#6  | 124.80(19) |

|                      |           |                     |            |
|----------------------|-----------|---------------------|------------|
| Ba(5)-O(7)#3         | 3.240(7)  | O(6)#3-Ba(2)-O(7)   | 146.11(18) |
| Ba(5)-Cl(1)#3        | 3.274(3)  | O(4)#4-Ba(2)-O(7)   | 124.80(19) |
| Ba(6)-O(7)#3         | 2.731(7)  | O(4)#5-Ba(2)-O(7)   | 91.36(19)  |
| Ba(6)-O(7)#7         | 2.731(7)  | O(7)#6-Ba(2)-O(7)   | 57.4(3)    |
| Ba(6)-O(5)#11        | 2.784(7)  | O(6)#3-Ba(2)-O(8)   | 78.06(13)  |
| Ba(6)-O(5)           | 2.784(7)  | O(4)#4-Ba(2)-O(8)   | 116.42(19) |
| Ba(6)-O(8)           | 2.931(7)  | O(4)#5-Ba(2)-O(8)   | 48.59(19)  |
| Ba(6)-O(8)#11        | 2.931(7)  | O(7)#6-Ba(2)-O(8)   | 132.10(19) |
| Ba(6)-O(6)#3         | 3.105(6)  | O(7)-Ba(2)-O(8)     | 74.73(19)  |
| Ba(6)-O(6)#8         | 3.105(6)  | O(6)#3-Ba(2)-O(8)#6 | 78.06(13)  |
| Ge(1)-O(6)           | 1.729(9)  | O(4)#4-Ba(2)-O(8)#6 | 48.59(19)  |
| Ge(1)-O(7)           | 1.747(7)  | O(4)#5-Ba(2)-O(8)#6 | 116.42(19) |
| Ge(1)-O(7)#6         | 1.747(7)  | O(7)#6-Ba(2)-O(8)#6 | 74.73(19)  |
| Ge(1)-O(1)           | 1.755(9)  | O(7)-Ba(2)-O(8)#6   | 132.10(19) |
| B(1)-O(8)            | 1.364(12) | O(8)-Ba(2)-O(8)#6   | 152.8(3)   |
| B(1)-O(3)            | 1.374(12) | O(6)#3-Ba(2)-O(7)#7 | 80.4(2)    |
| B(1)-O(4)#5          | 1.402(12) | O(4)#4-Ba(2)-O(7)#7 | 164.40(18) |
| B(2)-O(5)            | 1.363(10) | O(4)#5-Ba(2)-O(7)#7 | 115.7(2)   |
| B(2)-O(5)#1          | 1.363(10) | O(7)#6-Ba(2)-O(7)#7 | 96.66(18)  |
| B(2)-O(2)#13         | 1.369(18) | O(7)-Ba(2)-O(7)#7   | 70.6(2)    |
| Cl(1)-Ba(1)#16       | 3.214(4)  | O(8)-Ba(2)-O(7)#7   | 67.09(19)  |
| Cl(1)-Ba(5)#12       | 3.274(3)  | O(8)#6-Ba(2)-O(7)#7 | 121.04(19) |
| Cl(1)-Ba(5)#17       | 3.274(3)  | O(6)#3-Ba(2)-O(7)#8 | 80.4(2)    |
| O(1)-Ba(3)#5         | 2.632(8)  | O(4)#4-Ba(2)-O(7)#8 | 115.7(2)   |
| O(1)-Ba(3)#12        | 2.660(8)  | O(4)#5-Ba(2)-O(7)#8 | 164.40(18) |
| O(1)-Ba(5)#15        | 3.008(3)  | O(7)#6-Ba(2)-O(7)#8 | 70.6(2)    |
| O(1)-Ba(5)#12        | 3.008(3)  | O(7)-Ba(2)-O(7)#8   | 96.66(18)  |
| O(2)-B(2)#13         | 1.369(18) | O(8)-Ba(2)-O(7)#8   | 121.04(19) |
| O(2)-Ba(4)#10        | 2.724(6)  | O(8)#6-Ba(2)-O(7)#8 | 67.09(19)  |
| O(3)-Ba(5)#4         | 2.810(7)  | O(7)#7-Ba(2)-O(7)#8 | 55.5(3)    |
| O(4)-B(1)#9          | 1.402(12) | O(6)#3-Ba(2)-O(1)   | 148.4(3)   |
| O(4)-Ba(3)#9         | 2.819(7)  | O(4)#4-Ba(2)-O(1)   | 68.81(18)  |
| O(4)-Ba(2)#9         | 2.847(7)  | O(4)#5-Ba(2)-O(1)   | 68.81(18)  |
| O(4)-Ba(5)#6         | 2.934(7)  | O(7)#6-Ba(2)-O(1)   | 56.03(19)  |
| O(4)-Ba(5)#5         | 3.049(7)  | O(7)-Ba(2)-O(1)     | 56.03(19)  |
| O(5)-Ba(4)#3         | 2.963(7)  | O(8)-Ba(2)-O(1)     | 96.74(13)  |
| O(6)-Ba(2)#12        | 2.542(9)  | O(8)#6-Ba(2)-O(1)   | 96.74(13)  |
| O(6)-Ba(3)#12        | 2.926(10) | O(7)#7-Ba(2)-O(1)   | 126.68(18) |
| O(6)-Ba(6)#12        | 3.105(6)  | O(7)#8-Ba(2)-O(1)   | 126.68(18) |
| O(6)-Ba(6)#8         | 3.105(6)  | O(1)#9-Ba(3)-O(1)#3 | 149.1(2)   |
| O(7)-Ba(6)#12        | 2.731(7)  | O(1)#9-Ba(3)-O(4)#6 | 77.5(2)    |
| O(7)-Ba(2)#8         | 3.003(7)  | O(1)#3-Ba(3)-O(4)#6 | 77.9(2)    |
| O(7)-Ba(5)#12        | 3.240(7)  | O(1)#9-Ba(3)-O(4)   | 77.5(2)    |
| O(3)#14-Ba(5)-O(1)#3 | 96.3(2)   | O(1)#3-Ba(3)-O(4)   | 77.9(2)    |

|                       |            |                      |            |
|-----------------------|------------|----------------------|------------|
| O(4)#6-Ba(5)-O(1)#3   | 68.9(2)    | O(4)#6-Ba(3)-O(4)    | 74.1(3)    |
| O(5)-Ba(5)-O(4)#9     | 125.85(19) | O(1)#9-Ba(3)-O(4)#4  | 76.1(2)    |
| O(3)-Ba(5)-O(4)#9     | 150.9(2)   | O(1)#3-Ba(3)-O(4)#4  | 127.46(19) |
| O(3)#14-Ba(5)-O(4)#9  | 65.55(18)  | O(4)#6-Ba(3)-O(4)#4  | 153.58(15) |
| O(4)#6-Ba(5)-O(4)#9   | 91.11(17)  | O(4)-Ba(3)-O(4)#4    | 101.7(2)   |
| O(1)#3-Ba(5)-O(4)#9   | 66.8(2)    | O(1)#9-Ba(3)-O(4)#5  | 76.1(2)    |
| O(5)-Ba(5)-O(7)#3     | 64.4(2)    | O(1)#3-Ba(3)-O(4)#5  | 127.46(19) |
| O(3)-Ba(5)-O(7)#3     | 90.58(18)  | O(4)#6-Ba(3)-O(4)#5  | 101.7(2)   |
| O(3)#14-Ba(5)-O(7)#3  | 143.02(19) | O(4)-Ba(3)-O(4)#5    | 153.58(15) |
| O(4)#6-Ba(5)-O(7)#3   | 119.47(19) | O(4)#4-Ba(3)-O(4)#5  | 70.2(3)    |
| O(1)#3-Ba(5)-O(7)#3   | 53.1(2)    | O(1)#9-Ba(3)-O(6)#3  | 149.7(3)   |
| O(4)#9-Ba(5)-O(7)#3   | 81.78(17)  | O(1)#3-Ba(3)-O(6)#3  | 61.2(3)    |
| O(5)-Ba(5)-Cl(1)#3    | 87.42(16)  | O(4)#6-Ba(3)-O(6)#3  | 125.01(19) |
| O(3)-Ba(5)-Cl(1)#3    | 125.71(16) | O(4)-Ba(3)-O(6)#3    | 125.01(19) |
| O(3)#14-Ba(5)-Cl(1)#3 | 66.31(16)  | O(4)#4-Ba(3)-O(6)#3  | 79.23(19)  |
| O(4)#6-Ba(5)-Cl(1)#3  | 110.88(15) | O(4)#5-Ba(3)-O(6)#3  | 79.23(19)  |
| O(1)#3-Ba(5)-Cl(1)#3  | 146.68(17) | O(1)#9-Ba(3)-O(3)    | 100.31(13) |
| O(4)#9-Ba(5)-Cl(1)#3  | 80.02(15)  | O(1)#3-Ba(3)-O(3)    | 87.31(13)  |
| O(7)#3-Ba(5)-Cl(1)#3  | 126.40(14) | O(4)#6-Ba(3)-O(3)    | 67.6(2)    |
| O(7)#3-Ba(6)-O(7)#7   | 126.9(3)   | O(4)-Ba(3)-O(3)      | 141.04(19) |
| O(7)#3-Ba(6)-O(5)#11  | 154.00(19) | O(4)#4-Ba(3)-O(3)    | 115.70(19) |
| O(7)#7-Ba(6)-O(5)#11  | 70.5(2)    | O(4)#5-Ba(3)-O(3)    | 47.77(18)  |
| O(7)#3-Ba(6)-O(5)     | 70.5(2)    | O(6)#3-Ba(3)-O(3)    | 74.98(12)  |
| O(7)#7-Ba(6)-O(5)     | 154.00(19) | O(1)#9-Ba(3)-O(3)#6  | 100.31(13) |
| O(5)#11-Ba(6)-O(5)    | 101.7(3)   | O(1)#3-Ba(3)-O(3)#6  | 87.31(13)  |
| O(7)#3-Ba(6)-O(8)     | 113.8(2)   | O(4)#6-Ba(3)-O(3)#6  | 141.04(19) |
| O(7)#7-Ba(6)-O(8)     | 71.2(2)    | O(4)-Ba(3)-O(3)#6    | 67.6(2)    |
| O(5)#11-Ba(6)-O(8)    | 89.2(2)    | O(4)#4-Ba(3)-O(3)#6  | 47.77(19)  |
| O(5)-Ba(6)-O(8)       | 84.21(19)  | O(4)#5-Ba(3)-O(3)#6  | 115.70(19) |
| O(7)#3-Ba(6)-O(8)#11  | 71.2(2)    | O(6)#3-Ba(3)-O(3)#6  | 74.98(12)  |
| O(7)#7-Ba(6)-O(8)#11  | 113.8(2)   | O(3)-Ba(3)-O(3)#6    | 148.2(2)   |
| O(5)#11-Ba(6)-O(8)#11 | 84.21(19)  | O(8)-Ba(4)-O(8)#7    | 154.3(3)   |
| O(5)-Ba(6)-O(8)#11    | 89.2(2)    | O(8)-Ba(4)-O(7)      | 83.8(2)    |
| O(8)-Ba(6)-O(8)#11    | 169.5(3)   | O(8)#7-Ba(4)-O(7)    | 76.3(2)    |
| O(7)#3-Ba(6)-O(6)#3   | 59.5(2)    | O(8)-Ba(4)-O(7)#7    | 76.3(2)    |
| O(7)#7-Ba(6)-O(6)#3   | 75.8(2)    | O(8)#7-Ba(4)-O(7)#7  | 83.8(2)    |
| O(5)#11-Ba(6)-O(6)#3  | 144.8(2)   | O(7)-Ba(4)-O(7)#7    | 78.9(3)    |
| O(5)-Ba(6)-O(6)#3     | 104.4(2)   | O(8)-Ba(4)-O(2)      | 72.4(2)    |
| O(8)-Ba(6)-O(6)#3     | 70.5(2)    | O(8)#7-Ba(4)-O(2)    | 130.1(2)   |
| O(8)#11-Ba(6)-O(6)#3  | 119.2(2)   | O(7)-Ba(4)-O(2)      | 152.9(2)   |
| O(7)#3-Ba(6)-O(6)#8   | 75.8(2)    | O(7)#7-Ba(4)-O(2)    | 107.0(2)   |
| O(7)#7-Ba(6)-O(6)#8   | 59.5(2)    | O(8)-Ba(4)-O(2)#10   | 130.1(2)   |
| O(5)#11-Ba(6)-O(6)#8  | 104.4(2)   | O(8)#7-Ba(4)-O(2)#10 | 72.4(2)    |
| O(5)-Ba(6)-O(6)#8     | 144.8(2)   | O(7)-Ba(4)-O(2)#10   | 107.0(2)   |

|                      |           |                       |            |
|----------------------|-----------|-----------------------|------------|
| O(8)-Ba(6)-O(6)#8    | 119.2(2)  | O(7)#7-Ba(4)-O(2)#10  | 152.9(2)   |
| O(8)#11-Ba(6)-O(6)#8 | 70.5(2)   | O(2)-Ba(4)-O(2)#10    | 80.0(3)    |
| O(6)#3-Ba(6)-O(6)#8  | 65.0(3)   | O(8)-Ba(4)-O(5)#11    | 91.1(2)    |
| O(6)-Ge(1)-O(7)      | 113.9(3)  | O(8)#7-Ba(4)-O(5)#11  | 96.7(2)    |
| O(6)-Ge(1)-O(7)#6    | 113.9(3)  | O(7)-Ba(4)-O(5)#11    | 147.1(2)   |
| O(7)-Ge(1)-O(7)#6    | 106.3(5)  | O(7)#7-Ba(4)-O(5)#11  | 68.3(2)    |
| O(6)-Ge(1)-O(1)      | 110.0(4)  | O(2)-Ba(4)-O(5)#11    | 48.8(2)    |
| O(7)-Ge(1)-O(1)      | 106.1(3)  | O(2)#10-Ba(4)-O(5)#11 | 101.1(2)   |
| O(7)#6-Ge(1)-O(1)    | 106.1(3)  | O(8)-Ba(4)-O(5)#12    | 96.7(2)    |
| O(8)-B(1)-O(3)       | 123.2(9)  | O(8)#7-Ba(4)-O(5)#12  | 91.1(2)    |
| O(8)-B(1)-O(4)#5     | 120.0(8)  | O(7)-Ba(4)-O(5)#12    | 68.3(2)    |
| O(3)-B(1)-O(4)#5     | 116.8(8)  | O(7)#7-Ba(4)-O(5)#12  | 147.1(2)   |
| O(5)-B(2)-O(5)#1     | 120.7(13) | O(2)-Ba(4)-O(5)#12    | 101.1(2)   |
| O(5)-B(2)-O(2)#13    | 119.6(7)  | O(2)#10-Ba(4)-O(5)#12 | 48.8(2)    |
| O(5)#1-B(2)-O(2)#13  | 119.6(7)  | O(5)#11-Ba(4)-O(5)#12 | 144.6(3)   |
| O(3)-Ba(5)-O(4)#6    | 68.26(19) | O(5)-Ba(5)-O(3)       | 73.8(2)    |
| O(3)#14-Ba(5)-O(4)#6 | 48.56(19) | O(5)-Ba(5)-O(3)#14    | 150.1(2)   |
| O(5)-Ba(5)-O(1)#3    | 113.6(2)  | O(3)-Ba(5)-O(3)#14    | 109.32(15) |
| O(3)-Ba(5)-O(1)#3    | 86.2(2)   | O(5)-Ba(5)-O(4)#6     | 141.78(19) |

#1  $x, y, -z$     #2  $-x+1/2, y-1/2, -z$     #3  $x, y-1, z$   
 #4  $-x+1/2, y+1/2, z$     #5  $-x+1/2, y+1/2, -z+1$   
 #6  $x, y, -z+1$     #7  $-x, -y+2, z$     #8  $-x, -y+2, -z+1$   
 #9  $-x+1/2, y-1/2, -z+1$     #10  $-x, -y+2, -z$   
 #11  $-x, -y+1, z$     #12  $x, y+1, z$     #13  $-x, -y+1, -z$   
 #14  $-x+1/2, y-1/2, z$     #15  $x, y+1, -z+1$   
 #16  $-x+1/2, y+1/2, -z$     #17  $x, y+1, -z$



**Table S3b.** Selected bond distances (Å) and angles (deg) for Ba<sub>7</sub>(BO<sub>3</sub>)<sub>3</sub>GeO<sub>4</sub>Br.

|               |            |                       |            |
|---------------|------------|-----------------------|------------|
| Ba(1)-O(7)#1  | 2.630(7)   | O(2)#1-Ba(3)-O(6)#9   | 164.79(14) |
| Ba(1)-O(7)    | 2.662(7)   | O(6)#6-Ba(3)-O(6)#9   | 96.93(13)  |
| Ba(1)-O(2)    | 2.718(5)   | O(6)#7-Ba(3)-O(6)#9   | 70.65(17)  |
| Ba(1)-O(2)#2  | 2.718(5)   | O(5)#2-Ba(3)-O(6)#9   | 66.57(14)  |
| Ba(1)-O(2)#1  | 2.837(5)   | O(5)-Ba(3)-O(6)#9     | 120.66(14) |
| Ba(1)-O(2)#3  | 2.837(5)   | O(6)#8-Ba(3)-O(6)#9   | 55.82(19)  |
| Ba(1)-O(8)    | 2.951(7)   | O(8)-Ba(3)-O(7)#6     | 148.8(2)   |
| Ba(1)-O(3)    | 3.010(5)   | O(2)#3-Ba(3)-O(7)#6   | 68.85(14)  |
| Ba(1)-O(3)#2  | 3.010(5)   | O(2)#1-Ba(3)-O(7)#6   | 68.85(14)  |
| Ba(2)-O(1)    | 2.583(7)   | O(6)#6-Ba(3)-O(7)#6   | 55.56(14)  |
| Ba(2)-O(4)    | 2.770(5)   | O(6)#7-Ba(3)-O(7)#6   | 55.56(14)  |
| Ba(2)-O(4)#4  | 2.770(5)   | O(5)#2-Ba(3)-O(7)#6   | 97.66(11)  |
| Ba(2)-O(3)    | 2.971(5)   | O(5)-Ba(3)-O(7)#6     | 97.66(11)  |
| Ba(2)-O(3)#4  | 2.971(5)   | O(6)#8-Ba(3)-O(7)#6   | 126.21(14) |
| Ba(2)-O(5)#4  | 3.039(5)   | O(6)#9-Ba(3)-O(7)#6   | 126.21(14) |
| Ba(2)-O(5)    | 3.039(5)   | O(5)-Ba(4)-O(5)#10    | 153.3(2)   |
| Ba(2)-Br(1)   | 3.1424(15) | O(5)-Ba(4)-O(6)#8     | 75.41(15)  |
| Ba(2)-Br(1)#5 | 3.3052(17) | O(5)#10-Ba(4)-O(6)#8  | 84.05(15)  |
| Ba(3)-O(8)    | 2.567(7)   | O(5)-Ba(4)-O(6)#6     | 84.05(15)  |
| Ba(3)-O(2)#3  | 2.815(5)   | O(5)#10-Ba(4)-O(6)#6  | 75.41(15)  |
| Ba(3)-O(2)#1  | 2.815(5)   | O(6)#8-Ba(4)-O(6)#6   | 79.3(2)    |
| Ba(3)-O(6)#6  | 2.922(5)   | O(5)-Ba(4)-O(1)#11    | 130.51(18) |
| Ba(3)-O(6)#7  | 2.922(5)   | O(5)#10-Ba(4)-O(1)#11 | 73.12(17)  |
| Ba(3)-O(5)#2  | 2.954(5)   | O(6)#8-Ba(4)-O(1)#11  | 152.94(18) |
| Ba(3)-O(5)    | 2.954(5)   | O(6)#6-Ba(4)-O(1)#11  | 107.83(16) |
| Ba(3)-O(6)#8  | 3.014(5)   | O(5)-Ba(4)-O(1)       | 73.12(17)  |
| Ba(3)-O(6)#9  | 3.014(5)   | O(5)#10-Ba(4)-O(1)    | 130.51(18) |
| Ba(3)-O(7)#6  | 3.106(7)   | O(6)#8-Ba(4)-O(1)     | 107.83(16) |
| Ba(4)-O(5)    | 2.667(5)   | O(6)#6-Ba(4)-O(1)     | 152.94(18) |
| Ba(4)-O(5)#10 | 2.667(5)   | O(1)#11-Ba(4)-O(1)    | 78.0(2)    |
| Ba(4)-O(6)#8  | 2.688(5)   | O(5)-Ba(4)-O(4)#8     | 89.92(15)  |
| Ba(4)-O(6)#6  | 2.688(5)   | O(5)#10-Ba(4)-O(4)#8  | 98.12(15)  |
| Ba(4)-O(1)#11 | 2.711(4)   | O(6)#8-Ba(4)-O(4)#8   | 68.00(14)  |
| Ba(4)-O(1)    | 2.711(4)   | O(6)#6-Ba(4)-O(4)#8   | 147.25(14) |
| Ba(4)-O(4)#8  | 2.985(5)   | O(1)#11-Ba(4)-O(4)#8  | 100.52(16) |
| Ba(4)-O(4)#6  | 2.985(5)   | O(1)-Ba(4)-O(4)#8     | 49.18(17)  |
| B(1)-O(2)#1   | 1.391(9)   | O(5)-Ba(4)-O(4)#6     | 98.12(15)  |
| B(2)-O(1)#12  | 1.362(12)  | O(5)#10-Ba(4)-O(4)#6  | 89.92(15)  |
| B(2)-O(4)     | 1.390(7)   | O(6)#8-Ba(4)-O(4)#6   | 147.25(14) |
| B(2)-O(4)#4   | 1.390(7)   | O(6)#6-Ba(4)-O(4)#6   | 68.00(14)  |
| O(1)-B(2)#12  | 1.362(12)  | O(1)#11-Ba(4)-O(4)#6  | 49.18(17)  |
| O(1)-Ba(4)#11 | 2.711(4)   | O(1)-Ba(4)-O(4)#6     | 100.52(16) |

|                     |            |                       |            |
|---------------------|------------|-----------------------|------------|
| O(2)-B(1)#15        | 1.391(9)   | O(4)#8-Ba(4)-O(4)#6   | 144.72(18) |
| O(2)-Ba(3)#15       | 2.815(5)   | O(6)-Ba(5)-O(6)#8     | 129.1(2)   |
| O(2)-Ba(1)#15       | 2.837(5)   | O(6)-Ba(5)-O(4)#8     | 153.18(14) |
| O(2)-Ba(6)#2        | 2.950(5)   | O(6)#8-Ba(5)-O(4)#8   | 69.92(14)  |
| O(6)-Ba(3)#9        | 3.014(5)   | O(6)-Ba(5)-O(4)       | 69.92(14)  |
| O(7)-Ba(1)#15       | 2.630(7)   | O(6)#8-Ba(5)-O(4)     | 153.18(14) |
| O(7)-Ba(6)#2        | 2.9813(15) | O(4)#8-Ba(5)-O(4)     | 100.6(2)   |
| O(7)-Ba(3)#13       | 3.106(7)   | O(6)-Ba(5)-O(5)       | 114.15(15) |
| O(8)-Ba(5)#9        | 3.074(4)   | O(6)#8-Ba(5)-O(5)     | 70.88(15)  |
| O(7)#1-Ba(1)-O(7)   | 149.6(2)   | O(4)#8-Ba(5)-O(5)     | 88.85(14)  |
| O(7)#1-Ba(1)-O(2)   | 77.72(16)  | O(4)-Ba(5)-O(5)       | 84.21(14)  |
| O(7)-Ba(1)-O(2)     | 77.96(16)  | O(6)-Ba(5)-O(5)#8     | 70.88(15)  |
| O(7)#1-Ba(1)-O(2)#2 | 77.72(16)  | O(6)#8-Ba(5)-O(5)#8   | 114.15(15) |
| O(7)-Ba(1)-O(2)#2   | 77.96(16)  | O(4)#8-Ba(5)-O(5)#8   | 84.21(14)  |
| O(2)-Ba(1)-O(2)#2   | 72.9(2)    | O(4)-Ba(5)-O(5)#8     | 88.85(14)  |
| O(7)#1-Ba(1)-O(2)#1 | 76.38(16)  | O(5)-Ba(5)-O(5)#8     | 169.1(2)   |
| O(7)-Ba(1)-O(2)#1   | 126.97(15) | O(6)-Ba(5)-O(8)       | 60.30(17)  |
| O(2)-Ba(1)-O(2)#1   | 154.04(11) | O(6)#8-Ba(5)-O(8)     | 76.79(17)  |
| O(2)#2-Ba(1)-O(2)#1 | 102.83(16) | O(4)#8-Ba(5)-O(8)     | 145.24(16) |
| O(7)#1-Ba(1)-O(2)#3 | 76.38(16)  | O(4)-Ba(5)-O(8)       | 104.73(16) |
| O(7)-Ba(1)-O(2)#3   | 126.97(15) | O(5)-Ba(5)-O(8)       | 70.68(16)  |
| O(2)-Ba(1)-O(2)#3   | 102.83(16) | O(5)#8-Ba(5)-O(8)     | 119.36(16) |
| O(2)#2-Ba(1)-O(2)#3 | 154.04(11) | O(6)-Ba(5)-O(8)#9     | 76.79(17)  |
| O(2)#1-Ba(1)-O(2)#3 | 69.42(19)  | O(6)#8-Ba(5)-O(8)#9   | 60.30(17)  |
| O(7)#1-Ba(1)-O(8)   | 149.6(2)   | O(4)#8-Ba(5)-O(8)#9   | 104.73(16) |
| O(7)-Ba(1)-O(8)     | 60.8(2)    | O(4)-Ba(5)-O(8)#9     | 145.24(16) |
| O(2)-Ba(1)-O(8)     | 125.19(14) | O(5)-Ba(5)-O(8)#9     | 119.36(16) |
| O(2)#2-Ba(1)-O(8)   | 125.19(14) | O(5)#8-Ba(5)-O(8)#9   | 70.68(16)  |
| O(2)#1-Ba(1)-O(8)   | 78.71(15)  | O(8)-Ba(5)-O(8)#9     | 65.3(2)    |
| O(2)#3-Ba(1)-O(8)   | 78.71(15)  | O(4)-Ba(6)-O(3)       | 74.66(15)  |
| O(7)#1-Ba(1)-O(3)   | 100.46(10) | O(4)-Ba(6)-O(3)#14    | 148.82(14) |
| O(7)-Ba(1)-O(3)     | 87.18(11)  | O(3)-Ba(6)-O(3)#14    | 110.50(12) |
| O(2)-Ba(1)-O(3)     | 140.73(14) | O(4)-Ba(6)-O(2)#2     | 143.85(14) |
| O(2)#2-Ba(1)-O(3)   | 68.44(14)  | O(3)-Ba(6)-O(2)#2     | 69.66(14)  |
| O(2)#1-Ba(1)-O(3)   | 47.83(14)  | O(3)#14-Ba(6)-O(2)#2  | 48.36(14)  |
| O(2)#3-Ba(1)-O(3)   | 114.97(14) | O(4)-Ba(6)-O(7)       | 114.78(17) |
| O(8)-Ba(1)-O(3)     | 74.69(10)  | O(3)-Ba(6)-O(7)       | 87.19(17)  |
| O(7)#1-Ba(1)-O(3)#2 | 100.46(10) | O(3)#14-Ba(6)-O(7)    | 96.34(17)  |
| O(7)-Ba(1)-O(3)#2   | 87.18(11)  | O(2)#2-Ba(6)-O(7)     | 69.57(17)  |
| O(2)-Ba(1)-O(3)#2   | 68.44(14)  | O(4)-Ba(6)-O(2)#15    | 123.75(14) |
| O(2)#2-Ba(1)-O(3)#2 | 140.73(14) | O(3)-Ba(6)-O(2)#15    | 152.46(14) |
| O(2)#1-Ba(1)-O(3)#2 | 114.97(14) | O(3)#14-Ba(6)-O(2)#15 | 65.62(14)  |
| O(2)#3-Ba(1)-O(3)#2 | 47.83(14)  | O(2)#2-Ba(6)-O(2)#15  | 91.65(12)  |
| O(8)-Ba(1)-O(3)#2   | 74.69(10)  | O(7)-Ba(6)-O(2)#15    | 66.91(16)  |

---

|                      |            |                        |            |
|----------------------|------------|------------------------|------------|
| O(3)-Ba(1)-O(3)#2    | 147.5(2)   | O(4)-Ba(6)-O(6)        | 64.70(14)  |
| O(1)-Ba(2)-O(4)      | 93.75(17)  | O(3)-Ba(6)-O(6)        | 92.11(14)  |
| O(1)-Ba(2)-O(4)#4    | 93.75(17)  | O(3)#14-Ba(6)-O(6)     | 142.41(13) |
| O(4)-Ba(2)-O(4)#4    | 51.5(2)    | O(2)#2-Ba(6)-O(6)      | 121.42(13) |
| O(1)-Ba(2)-O(3)      | 114.46(10) | O(7)-Ba(6)-O(6)        | 53.84(16)  |
| O(4)-Ba(2)-O(3)      | 68.84(14)  | O(2)#15-Ba(6)-O(6)     | 80.36(13)  |
| O(4)#4-Ba(2)-O(3)    | 115.31(14) | O(4)-Ba(6)-Br(1)#13    | 85.66(11)  |
| O(1)-Ba(2)-O(3)#4    | 114.46(10) | O(3)-Ba(6)-Br(1)#13    | 125.72(11) |
| O(4)-Ba(2)-O(3)#4    | 115.31(14) | O(3)#14-Ba(6)-Br(1)#13 | 66.12(10)  |
| O(4)#4-Ba(2)-O(3)#4  | 68.84(14)  | O(2)#2-Ba(6)-Br(1)#13  | 110.54(10) |
| O(3)-Ba(2)-O(3)#4    | 130.4(2)   | O(7)-Ba(6)-Br(1)#13    | 145.92(13) |
| O(1)-Ba(2)-O(5)#4    | 68.93(11)  | O(2)#15-Ba(6)-Br(1)#13 | 79.09(9)   |
| O(4)-Ba(2)-O(5)#4    | 130.26(14) | O(6)-Ba(6)-Br(1)#13    | 124.16(9)  |
| O(4)#4-Ba(2)-O(5)#4  | 82.41(14)  | O(4)-Ba(6)-Br(1)#5     | 83.52(11)  |
| O(3)-Ba(2)-O(5)#4    | 160.90(14) | O(3)-Ba(6)-Br(1)#5     | 61.10(11)  |
| O(3)#4-Ba(2)-O(5)#4  | 46.99(14)  | O(3)#14-Ba(6)-Br(1)#5  | 73.61(10)  |
| O(1)-Ba(2)-O(5)      | 68.93(11)  | O(2)#2-Ba(6)-Br(1)#5   | 74.52(10)  |
| O(4)-Ba(2)-O(5)      | 82.41(14)  | O(7)-Ba(6)-Br(1)#5     | 138.64(14) |
| O(4)#4-Ba(2)-O(5)    | 130.26(14) | O(2)#15-Ba(6)-Br(1)#5  | 134.77(9)  |
| O(3)-Ba(2)-O(5)      | 46.99(14)  | O(6)-Ba(6)-Br(1)#5     | 143.55(9)  |
| O(3)#4-Ba(2)-O(5)    | 160.90(14) | Br(1)#13-Ba(6)-Br(1)#5 | 66.84(3)   |
| O(5)#4-Ba(2)-O(5)    | 127.3(2)   | O(8)-Ge(1)-O(7)        | 109.8(3)   |
| O(1)-Ba(2)-Br(1)     | 100.09(15) | O(8)-Ge(1)-O(6)#2      | 113.8(2)   |
| O(4)-Ba(2)-Br(1)     | 150.81(10) | O(7)-Ge(1)-O(6)#2      | 106.4(2)   |
| O(4)#4-Ba(2)-Br(1)   | 150.81(10) | O(8)-Ge(1)-O(6)        | 113.8(2)   |
| O(3)-Ba(2)-Br(1)     | 82.03(10)  | O(7)-Ge(1)-O(6)        | 106.4(2)   |
| O(3)#4-Ba(2)-Br(1)   | 82.03(10)  | O(6)#2-Ge(1)-O(6)      | 106.1(3)   |
| O(5)#4-Ba(2)-Br(1)   | 78.88(10)  | O(3)-B(1)-O(5)         | 121.9(6)   |
| O(5)-Ba(2)-Br(1)     | 78.88(10)  | O(3)-B(1)-O(2)#1       | 118.9(7)   |
| O(1)-Ba(2)-Br(1)#5   | 174.83(15) | O(5)-B(1)-O(2)#1       | 119.2(6)   |
| O(4)-Ba(2)-Br(1)#5   | 90.90(10)  | O(1)#12-B(2)-O(4)      | 120.0(4)   |
| O(4)#4-Ba(2)-Br(1)#5 | 90.90(10)  | O(1)#12-B(2)-O(4)#4    | 120.0(4)   |
| O(3)-Ba(2)-Br(1)#5   | 65.27(10)  | O(4)-B(2)-O(4)#4       | 119.9(9)   |
| O(3)#4-Ba(2)-Br(1)#5 | 65.27(10)  | O(6)#6-Ba(3)-O(5)#2    | 132.91(14) |
| O(5)#4-Ba(2)-Br(1)#5 | 109.55(10) | O(6)#7-Ba(3)-O(5)#2    | 75.20(14)  |
| O(5)-Ba(2)-Br(1)#5   | 109.55(10) | O(8)-Ba(3)-O(5)        | 77.27(10)  |
| Br(1)-Ba(2)-Br(1)#5  | 74.74(3)   | O(2)#3-Ba(3)-O(5)      | 116.97(15) |
| O(8)-Ba(3)-O(2)#3    | 85.89(16)  | O(2)#1-Ba(3)-O(5)      | 48.76(15)  |
| O(8)-Ba(3)-O(2)#1    | 85.89(16)  | O(6)#6-Ba(3)-O(5)      | 75.20(14)  |
| O(2)#3-Ba(3)-O(2)#1  | 70.0(2)    | O(6)#7-Ba(3)-O(5)      | 132.91(14) |
| O(8)-Ba(3)-O(6)#6    | 146.09(13) | O(5)#2-Ba(3)-O(5)      | 151.7(2)   |
| O(2)#3-Ba(3)-O(6)#6  | 124.37(14) | O(8)-Ba(3)-O(6)#8      | 80.48(17)  |
| O(2)#1-Ba(3)-O(6)#6  | 90.60(14)  | O(2)#3-Ba(3)-O(6)#8    | 164.79(14) |
| O(8)-Ba(3)-O(6)#7    | 146.09(13) | O(2)#1-Ba(3)-O(6)#8    | 115.33(14) |

---

|                     |            |                     |            |
|---------------------|------------|---------------------|------------|
| O(2)#3-Ba(3)-O(6)#7 | 90.60(14)  | O(6)#6-Ba(3)-O(6)#8 | 70.65(17)  |
| O(2)#1-Ba(3)-O(6)#7 | 124.37(14) | O(6)#7-Ba(3)-O(6)#8 | 96.93(13)  |
| O(6)#6-Ba(3)-O(6)#7 | 57.74(19)  | O(5)#2-Ba(3)-O(6)#8 | 120.66(14) |
| O(8)-Ba(3)-O(5)#2   | 77.27(10)  | O(5)-Ba(3)-O(6)#8   | 66.57(14)  |
| O(2)#3-Ba(3)-O(5)#2 | 48.76(15)  | O(8)-Ba(3)-O(6)#9   | 80.48(17)  |
| O(2)#1-Ba(3)-O(5)#2 | 116.97(15) | O(2)#3-Ba(3)-O(6)#9 | 115.33(14) |

#1  $-x+1/2, y-1/2, -z+1$     #2  $x, y, -z+1$   
 #3  $-x+1/2, y-1/2, z$     #4  $x, y, -z$     #5  $-x+1/2, y+1/2, -z$   
       #6  $x, y-1, z$     #7  $x, y-1, -z+1$     #8  $-x, -y+2, z$   
 #9  $-x, -y+2, -z+1$     #10  $-x, -y+1, z$     #11  $-x, -y+1, -z$   
       #12  $-x, -y+2, -z$     #13  $x, y+1, z$     #14  $-x+1/2, y+1/2, z$   
 #15  $-x+1/2, y+1/2, -z+1$     #16  $-x+1/2, y-1/2, -z$   
 #17  $x, y-1, -z$

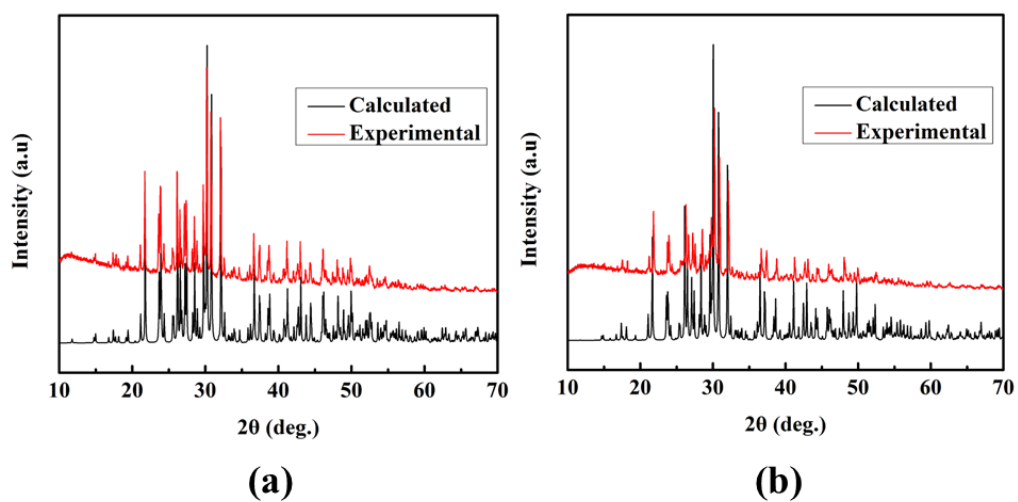

**Figure S1.** Experimental and calculated XRD patterns of  $\text{Ba}_7(\text{BO}_3)_3\text{GeO}_4\text{Cl}$  (a) and  $\text{Ba}_7(\text{BO}_3)_3\text{GeO}_4\text{Br}$  (b)

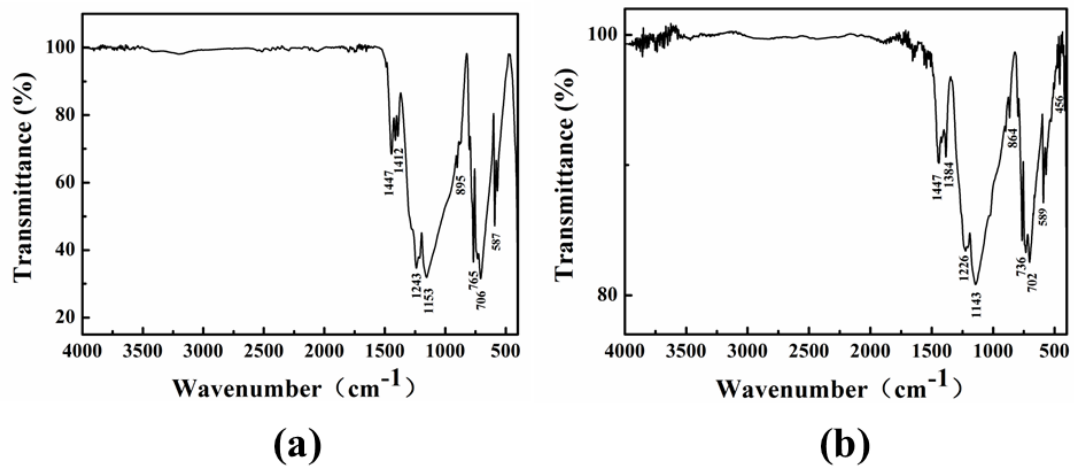

**Figure S2.** IR spectra of  $\text{Ba}_7(\text{BO}_3)_3\text{GeO}_4\text{Cl}$  (a) and  $\text{Ba}_7(\text{BO}_3)_3\text{GeO}_4\text{Br}$  (b)

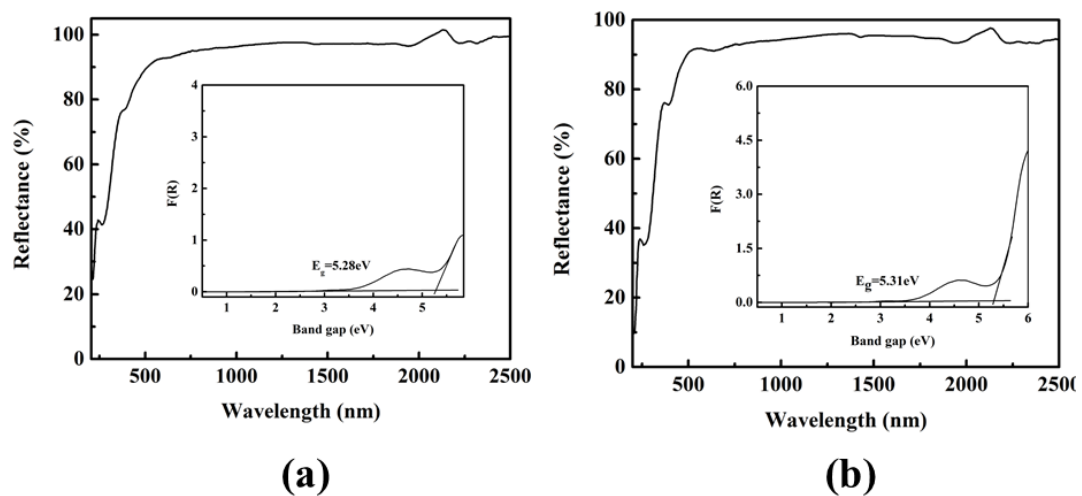

**Figure S3.** UV-vis-NIR diffuse reflectance spectra of Ba<sub>7</sub>(BO<sub>3</sub>)<sub>3</sub>GeO<sub>4</sub>Cl (a) and Ba<sub>7</sub>(BO<sub>3</sub>)<sub>3</sub>GeO<sub>4</sub>Br (b)

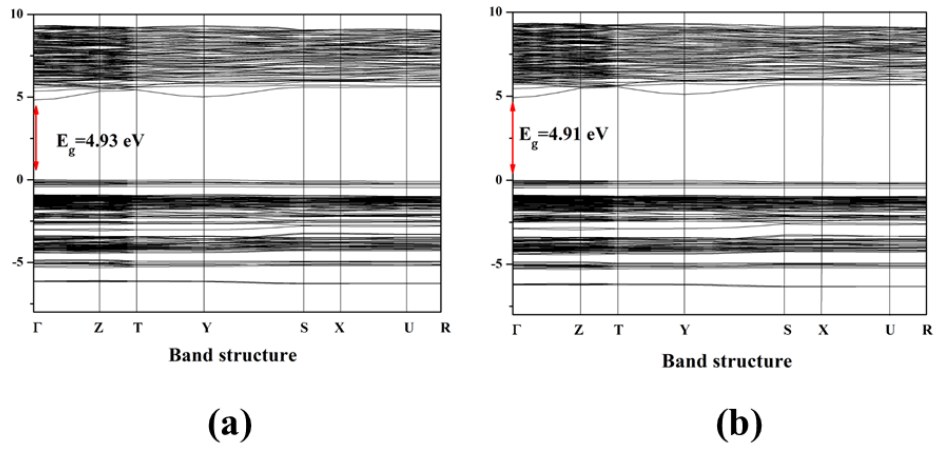

**Figure S4.** Band structures of  $\text{Ba}_7(\text{BO}_3)_3\text{GeO}_4\text{Cl}$  (a) and  $\text{Ba}_7(\text{BO}_3)_3\text{GeO}_4\text{Br}$  (b)



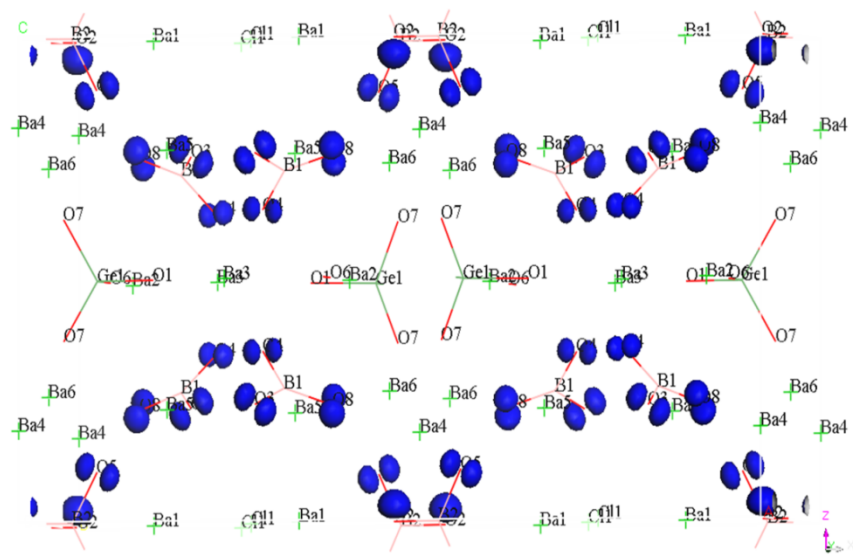

(a)

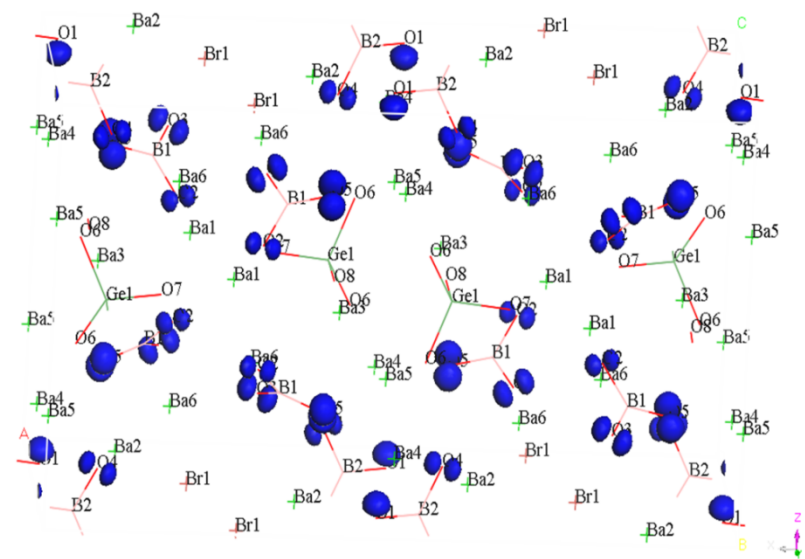

(b)

**Figure S5.** The highest occupied orbitals of  $\text{Ba}_7(\text{BO}_3)_3\text{GeO}_4\text{Cl}$  (a) and  $\text{Ba}_7(\text{BO}_3)_3\text{GeO}_4\text{Br}$  (b)

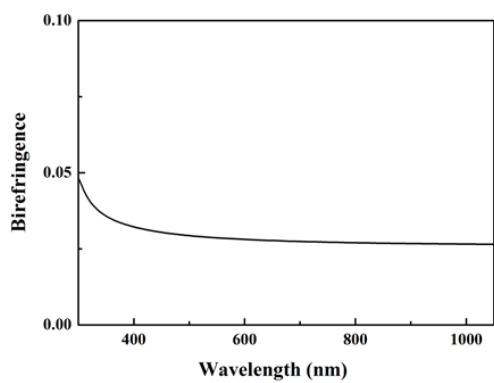

**(a)**

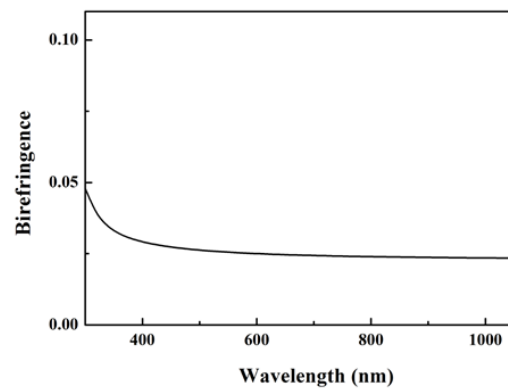

**(b)**

**Fi**

**Figure S6.** Calculated birefringences of  $\text{Ba}_7(\text{BO}_3)_3\text{GeO}_4\text{Cl}$  (a) and  $\text{Ba}_7(\text{BO}_3)_3\text{GeO}_4\text{Br}$  (b)
